# Supplementary material for: Cicadomorpha Community (Hemiptera: Auchenorrhyncha) in Portuguese Vineyards with Notes of Potential Vectors of Xylella fastidiosa
Source: MDPI journal article supplement (doi:10.3390/insects14030251), 2023-03-02
Supplement: s1 [file s1]

**Table S1.** Vineyards' information: sampling dates (2018 and 2019), metric characteristics, and management data.

| Vineyards | 2018 Sampling dates |        |        | 2019 Sampling dates |        |        | Y         | X         | Elevation (m) | Spacing (m) | Variety                         | Training System              | Insecticide                       | Herbicide                           | Fungicide                                                                                                                                                                                                                                                                                                                     | Production mode       | Soil management       |
|-----------|---------------------|--------|--------|---------------------|--------|--------|-----------|-----------|---------------|-------------|---------------------------------|------------------------------|-----------------------------------|-------------------------------------|-------------------------------------------------------------------------------------------------------------------------------------------------------------------------------------------------------------------------------------------------------------------------------------------------------------------------------|-----------------------|-----------------------|
|           | LS                  | S      | A      | LS                  | S      | A      |           |           |               |             |                                 |                              |                                   |                                     |                                                                                                                                                                                                                                                                                                                               |                       |                       |
| V1        | 27/jun              | 30/aug | 19/oct | 16/jul              | -      | 21/oct | 40.213508 | -8.455542 | 24,219        | 2.10 x 0.90 | Marselan                        | Cordon de Royat (unilateral) | Lambda-Cyhalothrin - July/ August | Glyphosate + Oxifluorfen - February | Mancozeb + Metalaxyl M - March/ April; Mancozeb - April; Wettable sulfur - April/ May; Cymoxanil + Folpet- April; Folpet + Fosetil al. + Iprovalicarb - May; Metiram + Piraclostrobin - May/ June; Kresoxim-methyl + diphenconazole - June; Copper Oxychloride - June; Penconazole - July/ August; Pirimetanil - July/ August | Integrated Production | Tillage between vines |
| V2        | 27/jun              | 30/aug | 19/oct | 16/jul              | -      | 21/oct | 40.207294 | -8.451814 | 43,258        | 2.30 x 1    | Castelão; Baga, Bical, Arinto   | Cordon de Royat (bilateral)  | Lambda-Cyhalothrin - July/ August | Glyphosate + Oxifluorfen - February | Mancozeb + Metalaxyl M - March/ April; Mancozeb - April; Wettable sulfur - April/ May; Cymoxanil + Folpet- April; Folpet + Fosetil al. + Iprovalicarb - May; Metiram + Piraclostrobin - May/ June; Kresoxim-methyl + diphenconazole - June; Copper Oxychloride - June; Penconazole - July/ August; Pirimetanil - July/ August | Integrated Production | Tillage between vines |
| V3        | 27/jun              | 30/aug | 19/oct | 16/jul              | 24/sep | 21/oct | 40.472186 | -8.55042  | 46,770        | 2.5 x 1     | Typical varieties of the region | Unilateral Cordon            | Lambda-Cyhalothrin - July/ August | Glyphosate + Oxifluorfen - February | Mancozeb + Metalaxyl M - March/ April; Mancozeb - April; Wettable sulfur - April/ May; Cymoxanil + Folpet- April; Folpet + Fosetil al. + Iprovalicarb - May; Metiram + Piraclostrobin - May/ June; Kresoxim-methyl + diphenconazole - June; Copper Oxychloride - June; Penconazole - July/ August; Pirimetanil - July/ August | Integrated Production | No                    |

|    |        |        |        |        |        |        |           |           |         |             |                                            |                              |                                   |                                     |                                                                                                                                                                                                                                                                                                                                |                       |                                           |
|----|--------|--------|--------|--------|--------|--------|-----------|-----------|---------|-------------|--------------------------------------------|------------------------------|-----------------------------------|-------------------------------------|--------------------------------------------------------------------------------------------------------------------------------------------------------------------------------------------------------------------------------------------------------------------------------------------------------------------------------|-----------------------|-------------------------------------------|
| V4 | 27/jun | 30/aug | 19/oct | 16/jul | 24/sep | 21/oct | 40.472386 | -8.555479 | 59,408  | 2.5 x 2     | Typical varieties of the region            | Unilateral Cordon            | Lambda-Cyhalothrin - July/ August | Glyphosate + Oxifluorfen - February | Mancozeb + Metalaxyl M - March/ April; Mancozeb - April; Wettable sulfur - April/ May; Cymoxanil + Folpet- April; Folpet + Fosetil al. + Iprovalicarb - May; Metirame + Piraclostrobin - May/ June; Kresoxim-methyl + diphenconazole - June; Copper Oxychloride - June; Penconazole - July/ August; Pirimetanil - July/ August | Integrated Production | No                                        |
| V5 | 27/jun | 30/aug | 19/oct | 16/jul | 24/sep | 21/oct | 40.461199 | -8.531627 | 54,375  | 2.30 x 1    | Typical varieties of the region            | Unilateral Cordon            | Lambda-Cyhalothrin - July/ August | Glyphosate + Oxifluorfen - February | Mancozeb + Metalaxyl M - March/ April; Mancozeb - April; Wettable sulfur - April/ May; Cymoxanil + Folpet- April; Folpet + Fosetil al. + Iprovalicarb - May; Metirame + Piraclostrobin - May/ June; Kresoxim-methyl + diphenconazole - June; Copper Oxychloride - June; Penconazole - July/ August; Pirimetanil - July/ August | Integrated Production | No                                        |
| V6 | 27/jun | 30/aug | 19/oct | 16/jul | -      | 21/oct | 40.212725 | -8.454453 | 27,714  | 2.30 x 0.90 | Touriga Nacional; Tinta Roriz; Alfrocheiro | Cordon de Royat (unilateral) | Lambda-Cyhalothrin - July/ August | Glyphosate + Oxifluorfen - February | Mancozeb + Metalaxyl M - March/ April; Mancozeb - April; Wettable sulfur - April/ May; Cymoxanil + Folpet- April; Folpet + Fosetil al. + Iprovalicarb - May; Metirame + Piraclostrobin - May/ June; Kresoxim-methyl + diphenconazole - June; Copper Oxychloride - June; Penconazole - July/ August; Pirimetanil - July/ August | Integrated Production | Between vines                             |
| V7 | -      | -      | -      | 19/jun | 23/sep | 21/oct | 40.140458 | -7.512300 | 473,104 | 3 x 1.50    | Touriga Nacional; Trincadeira, Syrah       | Bilateral Cordon             | -                                 | Glyphosate - March                  | Mancozeb + cymoxanil - May; Wettable sulfur- June; Fluopyram + tebuconazole - July                                                                                                                                                                                                                                             | Integrated Production | Vegetation cover mowing - June and August |
| V8 | -      | -      | -      | 19/jun | 23/sep | 21/oct | 40.164472 | -7.520331 | 439,722 | 3 x 1       | Touriga Nacional, Jaen                     | Bilateral Cordon             | -                                 | -                                   | Wettable sulfur - April                                                                                                                                                                                                                                                                                                        | Integrated Production | Vegetation cover mowing - March and June  |
| V9 | -      | -      | -      | 19/jun | 23/sep | 21/oct | 40.168936 | -7.510456 | 409,972 | 3 x 1       | Jaen, Rufette, Syrah                       | Bilateral Cordon             | -                                 | -                                   | Wettable sulfur - April                                                                                                                                                                                                                                                                                                        | Integrated Production | Vegetation cover mowing - April and June  |

|     |        |        |        |        |        |        |            |            |         |             |                                                              |                              |   |                     |                                                                                                                                                                                      |                       |                                                |
|-----|--------|--------|--------|--------|--------|--------|------------|------------|---------|-------------|--------------------------------------------------------------|------------------------------|---|---------------------|--------------------------------------------------------------------------------------------------------------------------------------------------------------------------------------|-----------------------|------------------------------------------------|
| V10 | -      | -      | -      | 19/jun | 23/sep | 21/oct | 40.326719  | -7.418683  | 459,561 | 3 x 1       | Jaen, Moscatel, Maroco                                       | Bilateral Cordon             | - | Glyphosate - April; | Azoxystrobin + Folpet - May; Mancozeb + metalaxyl-M - June; Tetraconazole - June; Fenebuconazole - July                                                                              | Integrated Production | Vegetation cover mowing - April and June       |
| V11 | -      | -      | -      | 19/jun | 23/sep | 21/oct | 40.317892  | -7.302781  | 484,359 | 3 x 2       | Touriga Nacional                                             | Unilateral Cordon            | - | Glyphosate - April; | Wettable sulfur - April; Dimethomorph + Dithianon - April/June; Penconazole - June                                                                                                   | Integrated Production | Vegetation cover mowing - April and June       |
| V12 | -      | -      | -      | 27/jul | 26/sep | 25/oct | 41.1485948 | -7.1271711 | 151,303 | 2.20 x 1    | Sousão                                                       | Cordon de Royat (bilateral)  | - | -                   | Wettable sulfur + Fosetyl aluminium - March; Cymoxanil + Folpet + Fosetyl aluminium + Spiroxamine - April; Kresoxim-methyl and Penconazole - June; Boscalid + Kresoxim-methyl - July | Integrated Production | Vegetation cover mowing - March, April and May |
| V13 | 4/jul  | 29/aug | 16/oct | 27/jul | 26/sep | 25/oct | 41.184728  | -7.109831  | 133,797 | 2 x 10      | Tinta Cão                                                    | Unilateral Cordon            | - | -                   | Wettable sulfur + Fosetyl aluminium - March; Mancozeb - May/ June                                                                                                                    | Integrated Production | No                                             |
| V14 | 11/jul | 29/aug | 16/oct | 27/jul | 26/sep | 22/oct | 41.224727  | -7.091073  | 125,710 | 2.20 x 0.95 | Tourina Nacional                                             | Cordon                       | - | -                   | Wettable sulfur + Fosetyl aluminium - March; Mancozeb - May                                                                                                                          | Integrated Production | No                                             |
| V15 | -      | -      | -      | 27/jul | 26/sep | 24/oct | 41.1169499 | -7.9869087 | 211,473 | 2 x 1.2     | Viognier                                                     | Cordon de Royat (unilateral) | - | -                   | Sulfur - April/ May/ June; Copper - April/ May/ June                                                                                                                                 | Organic               | Vegetation cover mowing - in March and April   |
| V16 | -      | -      | -      | 27/jul | 26/sep | 24/oct | 41.1550118 | -7.7978446 | 77,685  | 2 x 1       | Touriga Nacional, Tinta Roriz, Touriga Franca, Tinta Barroca | Cordon de Royat (unilateral) | - | Glyphosate - March; | Sulfur - May; Mandipropamid + zoxamid - May                                                                                                                                          | Integrated Production | No                                             |
| V17 | -      | -      | -      | 27/jul | 26/sep | 24/oct | 41.154265  | -7.687574  | 176,179 | 4.5 x 0.90  | Touriga Franca                                               | Cordon de Royat (unilateral) | - | -                   | Sulfur - April/ May/ June; Copper - April/ May/ June                                                                                                                                 | Organic               | Vegetation cover mowing - February and June    |
| V18 | -      | -      | -      | 27/jul | 26/sep | 24/oct | 41.171111  | -7.556944  | 289,758 | 2.30 x 0.80 | Touriga Nacional                                             | Cordon de Royat (unilateral) | - | Glyphosate - March; | Sulfur - May; Mandipropamid + zoxamid - May                                                                                                                                          | Integrated Production | No                                             |
| V19 | -      | -      | -      | 27/jul | 26/sep | 24/oct | 41.175709  | -7.530771  | 267,565 | 2.5 x 1     | Tinta Francista, Touriga Nacional, Vinhas Velhas             | Cordon de Royat (unilateral) | - | Glyphosate - March; | Folpet + Metalaxyl - April/ May; Sulfur and Penconazole - April; Fluopyram + tebuconazole - June; Copper sulfate - July; Boscalid + Kresoxim-methyl - July                           | Integrated Production | No                                             |
| V20 | -      | -      | -      | 27/jul | 26/sep | 24/oct | 41.180833  | -7.476667  | 285,160 | 2.20 x 1    | Touriga Nacional, Touriga Franca,                            | Cordon de Royat (unilateral) | - | Glyphosate - March; | Folpet + Metalaxyl - April/ May; Sulfur and Penconazole - April; Fluopyram + tebuconazole - June; Copper                                                                             | Integrated Production | No                                             |

|     |        |        |        |        |        |        |            |            |         |          |                                                       |                             |   |   |                                                                                                                                                            |                       |                                          |
|-----|--------|--------|--------|--------|--------|--------|------------|------------|---------|----------|-------------------------------------------------------|-----------------------------|---|---|------------------------------------------------------------------------------------------------------------------------------------------------------------|-----------------------|------------------------------------------|
|     |        |        |        |        |        |        |            |            |         |          |                                                       | Tinta Roriz,<br>Tinto Cão   |   |   | sulfate - July; Boscalid +<br>Kresoxim-methyl - July                                                                                                       |                       |                                          |
| V21 | -      | -      | -      | 27/jul | 26/sep | 24/oct | 41.108056  | -7.241389  | 300,447 | 2 x 1    | Touriga Franca                                        | Cordon de Royat (bilateral) | - | - | Folpet + Metalaxyl - April/ May; Sulfur and Penconazole - April; Fluopyram + tebuconazole - June; Copper sulfate - July; Boscalid + Kresoxim-methyl - July | Integrated Production | No                                       |
| V22 | 26/jun | 11/sep | 19/oct | 15/jul | 23/sep | 21/oct | 38.522541  | -8.953211  | 50,382  | 3 x 1    | Tinta Roriz, Touriga Nacional, Tinta Amarela          | Unilateral Cordon           | - | - | Mancozeb + cymoxanil - May; Wettable sulfur- June; Fluopyram + tebuconazole - July                                                                         | Integrated Production | No                                       |
| V23 | 26/jun | 11/sep | 19/oct | 15/jul | 23/sep | 21/oct | 38.567994  | -8.928173  | 99,902  | 3 x 1    | Roxo, Touriga Nacional                                | Unilateral Cordon           | - | - | Mancozeb + cymoxanil - May; Wettable sulfur- June; Fluopyram + tebuconazole - July                                                                         | Integrated Production | No                                       |
| V24 | 26/jun | 11/sep | 19/oct | 15/jul | -      | -      | 38.490498  | -9.022675  | 108,713 | 3 x 1    | Fernão Pires, Moscatel de Cordon                      | Unilateral Cordon           | - | - | Mancozeb + cymoxanil - May; Wettable sulfur- June; Fluopyram + tebuconazole - July                                                                         | Integrated Production | No                                       |
| V25 | 26/jun | 11/sep | 19/oct | 15/jul | 23/sep | 21/oct | 38.540465  | -8.985373  | 96,520  | 3 x 1    | Castelão, Trincadeira e Touriga Nacional              | Unilateral Cordon           | - | - | Mancozeb + cymoxanil - May; Wettable sulfur- June; Fluopyram + tebuconazole - July                                                                         | Integrated Production | No                                       |
| V26 | 11/jul | 29/aug | 16/oct | 15/jul | 17/sep | 22/oct | 41.5162149 | -7.092967  | 344,346 | 2 x 1    | Touriga-Franca; Sousão                                | Unilateral Cordon           | - | - | Sulfur and Copper - June/ July                                                                                                                             | Organic               | Vegetation cover mowing - June           |
| V27 | -      | -      | -      | 25/jun | 25/sep | 22/oct | 41.550195  | -7.259052  | 260,920 | 2 x 1    | Touriga Franca, Touriga Nacional, Bastardo, Viosinho, | Unilateral Cordon           | - | - | Wettable sulfur - May/ June/ July                                                                                                                          | Integrated Production | Vegetation cover mowing - March and June |
| V28 | -      | -      | -      | 25/jun | 25/sep | 22/oct | 41.59775   | -7.363637  | 510,649 | 2 x 2    | Códega do Larinho, Malvasia Fina,                     | Unilateral Cordon           | - | - | Wettable sulfur - May/ June/ July                                                                                                                          | Integrated Production | Vegetation cover mowing - March and June |
| V29 | 11/jul | 29/aug | 19/oct | 26/jun | 25/sep | 22/oct | 41.6473833 | -7.5843222 | 385,721 | 2 x 1    | Alvarinho                                             | Unilateral Cordon           | - | - | Malcozeb + cymoxanil - May; Wettable sulfur- June; Fluopyram + tebuconazole - July;                                                                        | Integrated Production | Vegetation cover mowing - June           |
| V30 | 11/jul | 29/aug | 16/oct | 26/jun | 1/oct  | 22/oct | 41.292179  | -7.112580  | 393,805 | 2 x 0.90 | Touriga-Franca, Touriga                               | Cordon                      | - | - | Wettable sulfur + Fosetyl aluminium - March; Mancozeb -May;                                                                                                | Integrated Production | No                                       |

|     |        |        |        |       |        |        |           |           |         |       |                                       |                      |                             |   |                                                                                                                                  |                          |    |
|-----|--------|--------|--------|-------|--------|--------|-----------|-----------|---------|-------|---------------------------------------|----------------------|-----------------------------|---|----------------------------------------------------------------------------------------------------------------------------------|--------------------------|----|
|     |        |        |        |       |        |        |           |           |         |       | Nacional,<br>Rabigato,                |                      |                             |   |                                                                                                                                  |                          |    |
| V31 | 22/jun | 28/aug | 26/oct | 8/jul | 25/sep | 21/oct | 41.680022 | -8.53092  | 168,628 | 3 x 1 | Espadeiro,<br>Borraçal,<br>Alvarinho  | Unilateral<br>Cordon | Deltamethrin<br>- June/July | - | Folpet + Metalaxyl - April/<br>May; Mancozeb + cymoxanil -<br>May; Wettable sulfur- June;<br>Fluopyram + tebuconazole -<br>July; | Integrated<br>Production | No |
| V32 | 22/jun | 28/aug | 26/oct | 8/jul | 24/sep | 21/oct | 41.678658 | -8.531356 | 165,049 | 3 x 1 | Alvarinho                             | Unilateral<br>Cordon | Deltamethrin<br>- June/July | - | Folpet + Metalaxyl - April/<br>May; Mancozeb + cymoxanil -<br>May; Wettable sulfur- June;<br>Fluopyram + tebuconazole -<br>July; | Integrated<br>Production | No |
| V33 | 22/jun | 28/aug | 26/oct | 8/jul | 25/sep | 21/oct | 41.785855 | -8.494984 | 68,918  | 3 x 1 | Alvarelhão,<br>Borraçal,<br>Pedral    | Unilateral<br>Cordon | Deltamethrin<br>- June/July | - | Folpet + Metalaxyl - April/<br>May; Mancozeb + cymoxanil -<br>May; Wettable sulfur- June;<br>Fluopyram + tebuconazole -<br>July; | Integrated<br>Production | No |
| V34 | 22/jun | 28/aug | 26/oct | 8/jul | 25/sep | 21/oct | 41.815375 | -8.410264 | 57,641  | 3 x 1 | Amaral,<br>Rabo de<br>Anho,<br>Vinhão | Unilateral<br>Cordon | Deltamethrin<br>- June/July | - | Folpet + Metalaxyl - April/<br>May; Mancozeb + cymoxanil -<br>May; Wettable sulfur- June;<br>Fluopyram + tebuconazole -<br>July; | Integrated<br>Production | No |
| V35 | 22/jun | 28/aug | 26/oct | 8/jul | 25/sep | 21/oct | 41.792375 | -8.538943 | 39,478  | 3 x 1 | Vinhão,<br>Espadeiro                  | Unilateral<br>Cordon | Deltamethrin<br>- June/July | - | Folpet + Metalaxyl - April/<br>May; Mancozeb + cymoxanil -<br>May; Wettable sulfur- June;<br>Fluopyram + tebuconazole -<br>July; | Integrated<br>Production | No |

LS – Late spring; S – Summer; A – Autumn; Y – Latitude; X – Longitude.
